# Supplementary material
Source: HighWire-hosted journal article supplement (https://molpharm.aspetjournals.org/highwire/filestream/86536/field_highwire_adjunct_files/1/202_supp_fig_2.pdf)
Supplement: 202_supp_fig_2.pdf [file 202_supp_fig_2.pdf]

## Figure S2

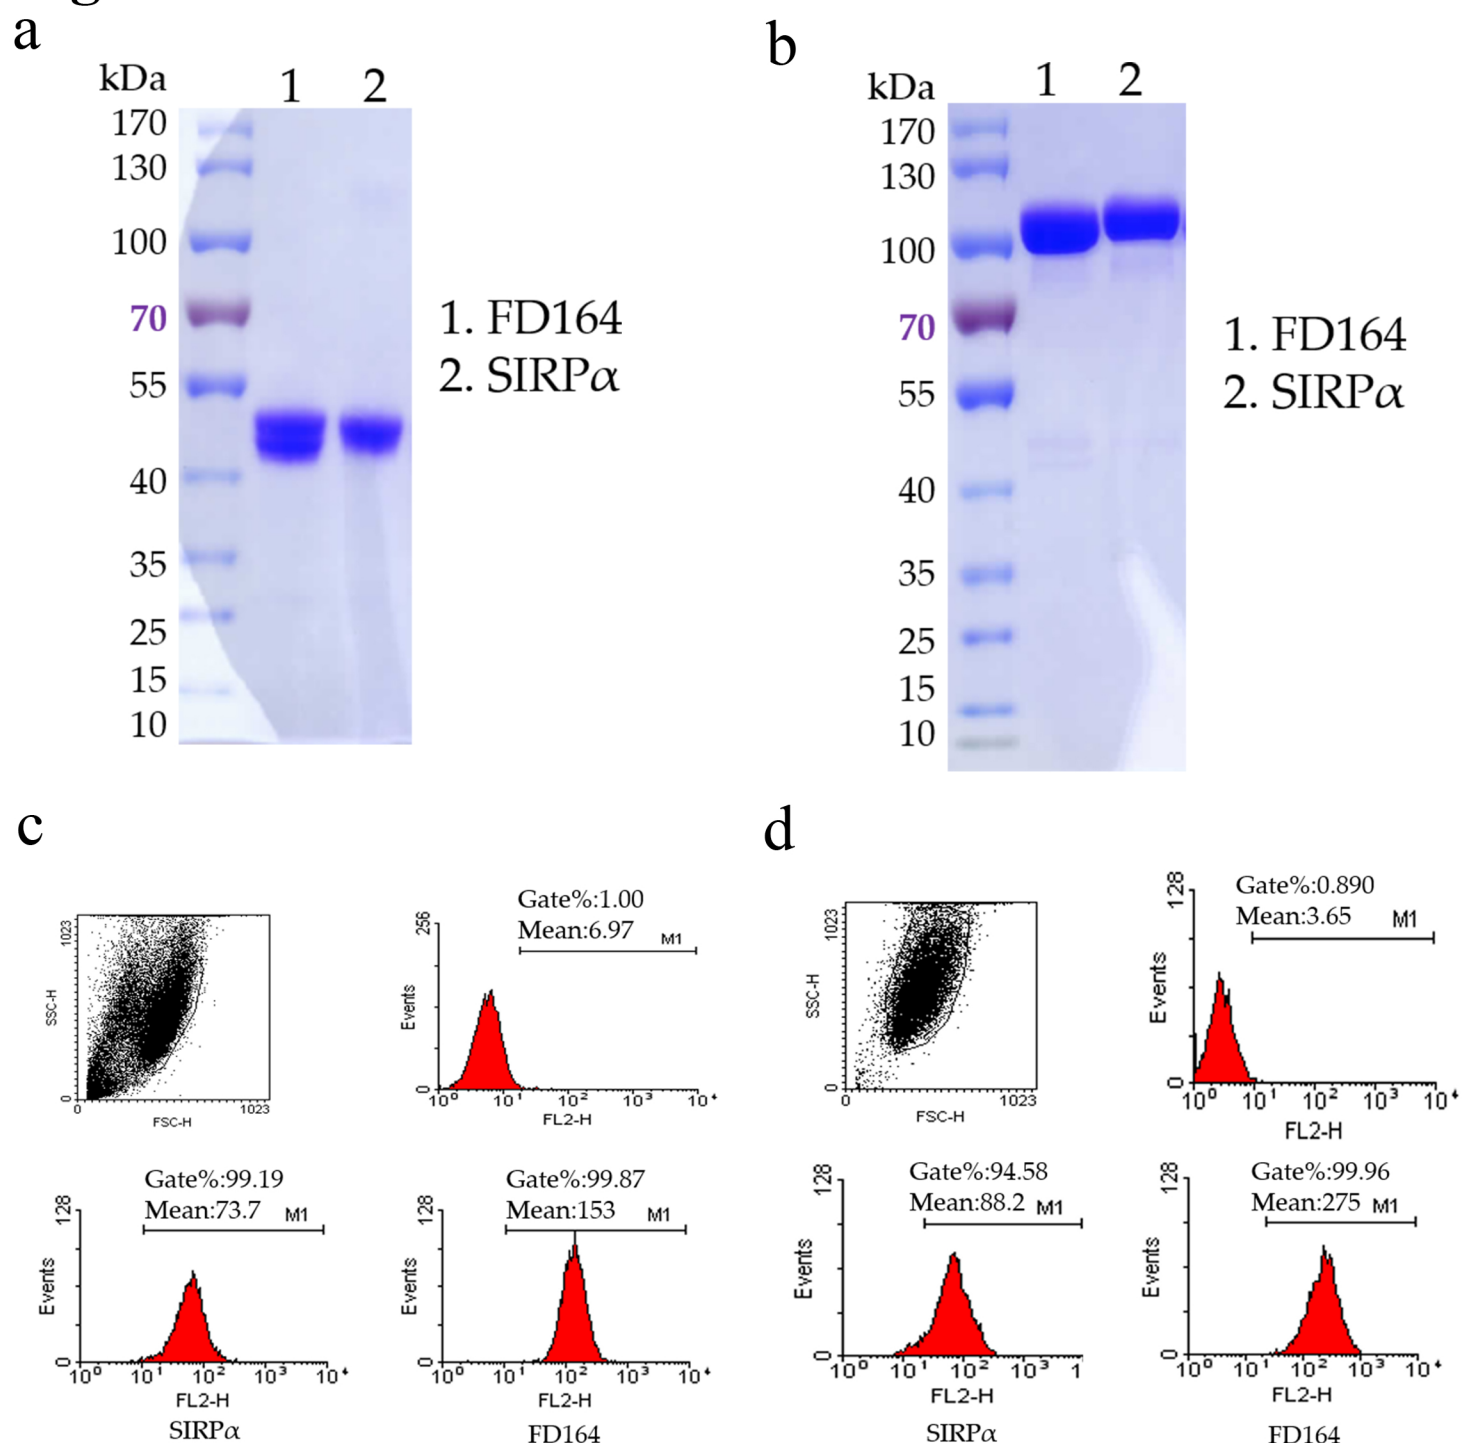

**Figure S2. Analysis of purified proteins by agarose gel electrophoresis and the binding activity of FD164 to CD47 on the cancer cell lines by FACS. a.** Reduced SDS-PAGE of purified proteins. **b.** Non-reduced SDS-PAGE of purified proteins. **c.** The binding activity of FD164 to CD47 on the Raji cells. **d.** The binding activity of FD164 to CD47 on the PC9 cells.
